# Supplementary material for: Link between the North Atlantic Oscillation and the surface mass balance components of the Greenland Ice Sheet under preindustrial and last interglacial climates: a study with a coupled global circulation model
Source: Copernicus journal article supplement (doi:10.5194/cp-14-1707-2018), 2018-11-12
Supplement: Supplementary file 1 [file cp-14-1707-2018-supplement.pdf]

Supplement of *Clim. Past*, 14, 1707–1725, 2018  
<https://doi.org/10.5194/cp-14-1707-2018-supplement>  
© Author(s) 2018. This work is distributed under  
the Creative Commons Attribution 4.0 License.

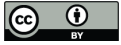

*Supplement of*

## **Link between the North Atlantic Oscillation and the surface mass balance components of the Greenland Ice Sheet under preindustrial and last interglacial climates: a study with a coupled global circulation model**

**Silvana Ramos Buarque and David Salas y Melia**

*Correspondence to:* Silvana Ramos Buarque ([silvana.buarque@meteo.fr](mailto:silvana.buarque@meteo.fr))

The copyright of individual parts of the supplement might differ from the CC BY 4.0 License.

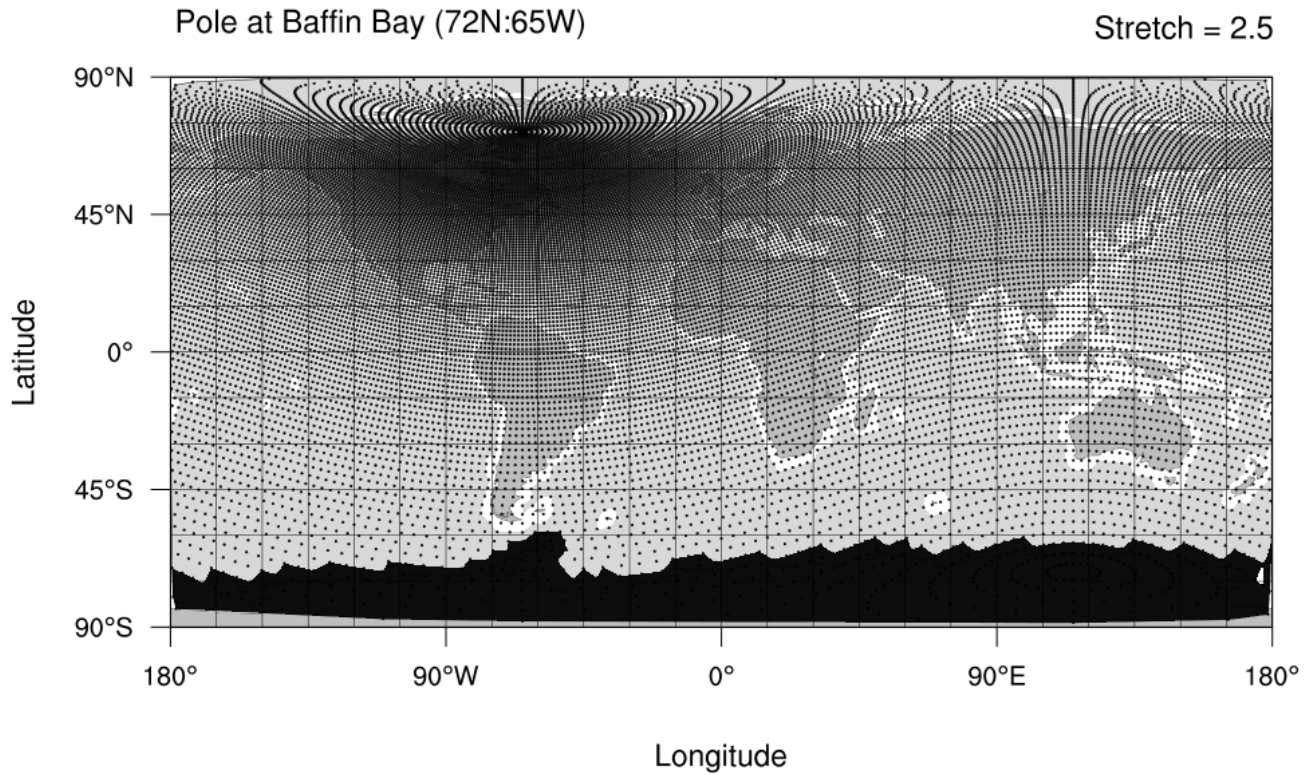

**Fig. S1.** The ARPEGE-Climat horizontal grid with its north pole tilted to Baffin Bay at 72N:65W and a stretch factor of 2.5 following the spherical harmonic-based functions on a transformed sphere (Courtier and Geleyn, 1988).

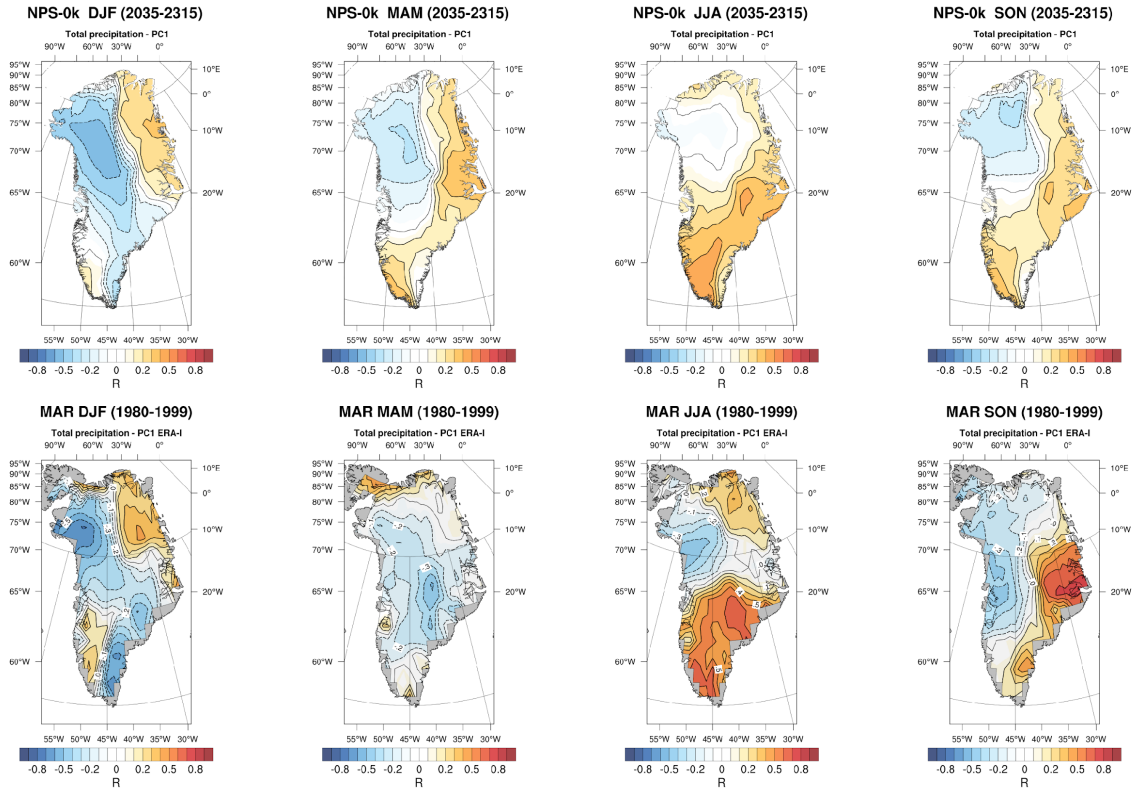

**Fig. S2.** Seasonal 2D correlations of total precipitation with the NAO index defined as the normalized leading PC derived from an EOF analysis of SLP over the extra-tropical North Atlantic (20°N–70°N; 90°W–40°E). (top) NPS-0k (years 1-280) simulation. (bottom) Correlation of total precipitation simulated by MAR with the NAO index computed from ERA-Interim (1980-1999).

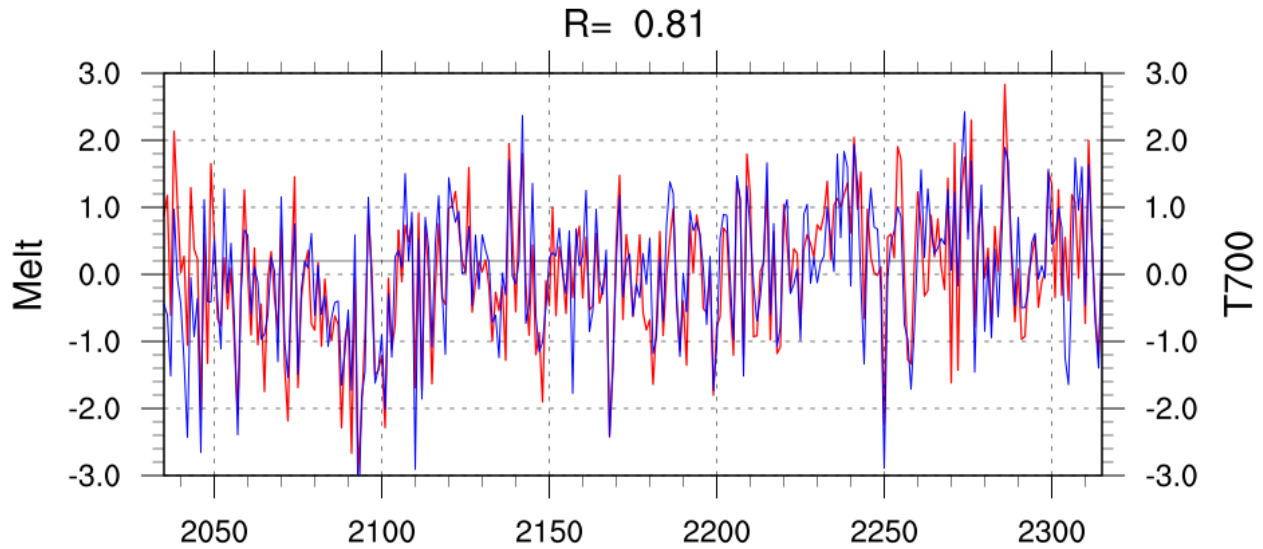

**Fig. S3.** Normalized time series of the annual GrIS melt simulated by NPS-0k (in red) and of the area-averaged temperature at 700 hPa (T700) in JJA over the latitude-longitude box (20°W: 70°W; 60°N:85°N) according to Fettweis et al. (2013a). This result suggests that variations of T700 simulated by NPS-0k could be chosen as a proxy for variations of surface melt. The correlation ( $R=0.81$ ) obtained with CNRM-CM5.2 (years 1-280) is slightly lower than that obtained between the annual GrIS melt amount simulated by MAR over 1993-2012 and the JJA T700 from the NCEP-NCAR reanalysis ( $R=0.93$ ).

**Table S1.** Seasonal (DJF and JJA) correlations between detrended accumulation, melting and SMB averaged on GrIS and the NAO index for MAR over 1980-1999 and NPS under all climates (years 1-280). The SMB and NAO time series are plotted in Figs. S4 (DJF) and S5 (JJA).

|          | Accumulation |      | Melting |      | SMB   |      |
|----------|--------------|------|---------|------|-------|------|
|          | DJF          | JJA  | DJF     | JJA  | DJF   | JJA  |
| MAR      | -0.21        | 0.54 | -       | 0.37 | -0.21 | 0.40 |
| NPS-0k   | -0.22        | 0.48 | -       | 0.51 | -0.22 | 0.62 |
| NPS-115k | -0.11        | 0.43 | -       | 0.56 | -0.11 | 0.62 |
| NPS-130k | -0.04        | 0.48 | -       | 0.43 | -0.04 | 0.56 |

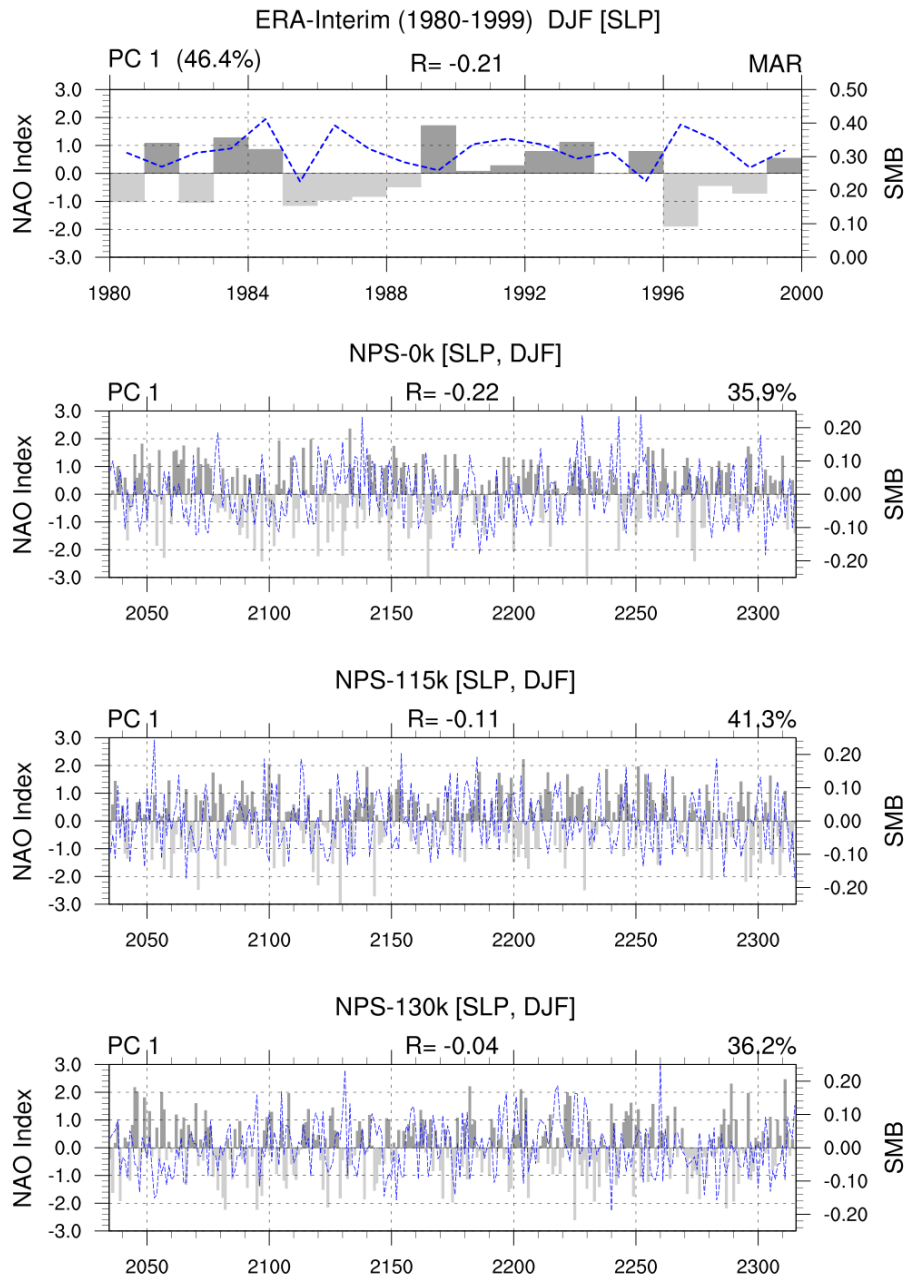

**Fig. S4.** (grey bars) Time series of the NAO index and (dashed lines) averaged SMB over Greenland for winter (DJF).

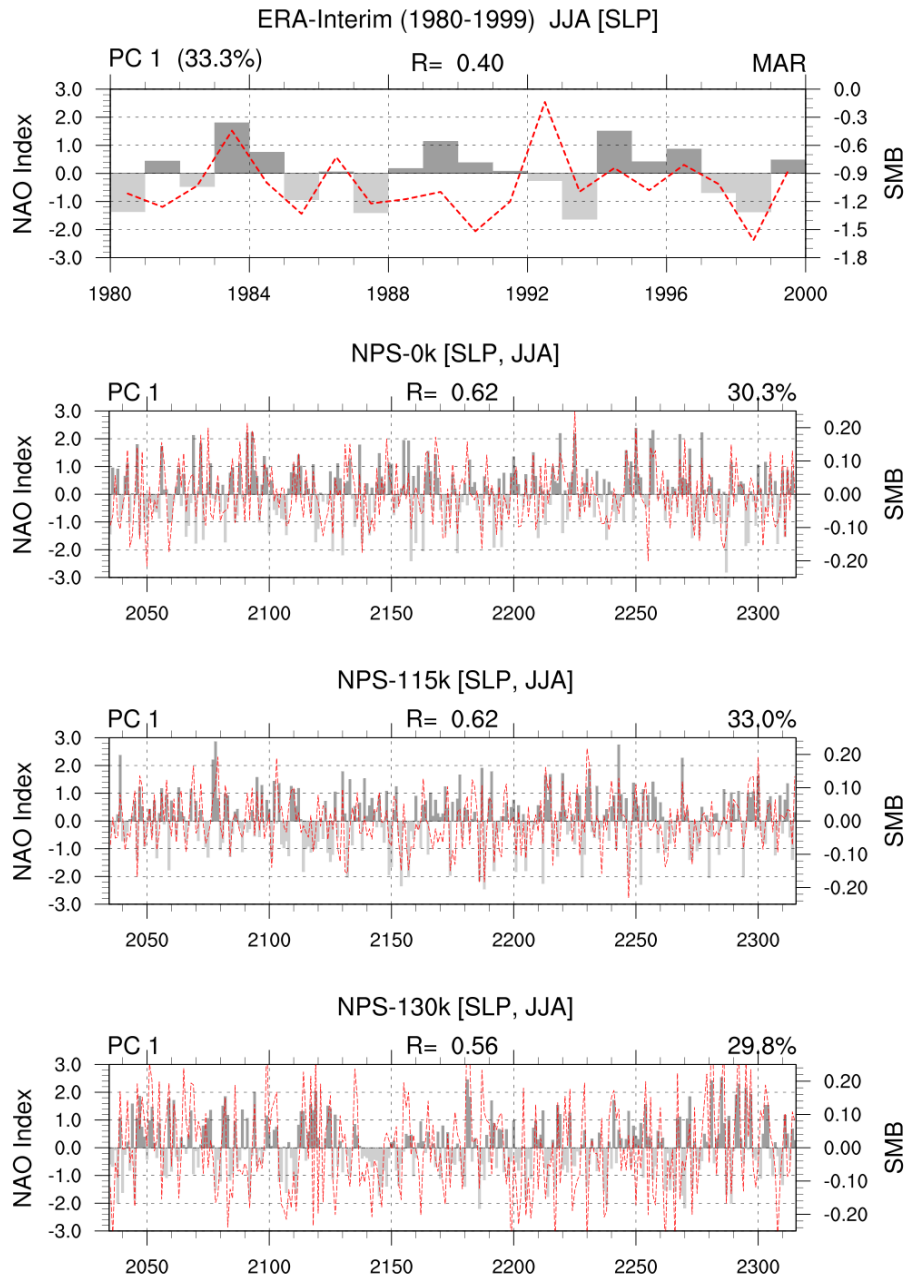

**Fig. S5.** Same as Fig. S4, but for summer (JJA).
